# Supplementary material for: Elastic scattering spectrum fused with Raman spectrum for rapid classification of colorectal cancer tissues
Source: Royal Society of Chemistry journal article supplement (doi:10.1039/d4ay02221a), 2025-01-01
Supplement: d4ay02221a1.pdf [file d4ay02221a1.pdf]

## Supporting information

### 1. Angle distribution of Mie scattering:

$$I(\theta) \propto \left| \frac{2n+1}{n(n+1)} \sum_{m=1}^n (2m+1) i^m a_m P_m^1(\cos \theta) \right|^2 \quad (S1)$$

$\theta$ : Scattering angle;

$n$ : Number of terms in the expansion of Bessel functions, and it is related to the size of particles and the wavelength of light;

$a_m$ : Coefficient related to particle refractive index;

$P_m^1(\cos \theta)$ : First type of joint Legendre polynomial.

### 2. Spectrum data augmentation formula:

$$NewValue = RawValue + (RawValue \times random(-0.02,0.02)) \quad (S2)$$

*NewValue*: Spectrum value after augmentation;

*RawValue*: Raw spectrum value;

*random*(-0.02,0.02): Random function.

### 3. z-score normalization:

$$x_j^{(i)} = \frac{x_j^{(i)} - \mu_j}{\sigma_j} \quad (S3)$$

$$\mu_j = \frac{1}{m} \sum_{i=0}^{m-1} x_j^{(i)} \quad (S4)$$

$$\sigma_j^2 = \frac{1}{m} \sum_{i=0}^{m-1} (x_j^{(i)} - \mu_j)^2 \quad (S5)$$

$$y_i' = \frac{y_i - y_{\min}}{y_{\max} - y_{\min}} \quad (S6)$$

$j$ : The  $j$ -th characteristic of the spectrum;

$\mu_j$ : The mean of all features of the feature dimension;

$\sigma_j$ : The standard deviation of all features of the feature dimension;

$y_i$ : Represents the signal strength corresponding to the i-th angular position in each ray of light scattering data;

$y_i$ : Represents the normalized value;

$y_{min}$ : Represents the minimum value of light scattering data;

$y_{max}$ : Represents the maximum value of the light scattering data;

4.

$$\hat{y} = \sum_{i=1}^N w_i \times y_i \quad (S7)$$

$$w_i = \frac{A_i}{\sum_{j=1}^N A_j} \quad (S8)$$

$y_i$ : A single model predicts the outcome;

$\hat{y}$ : Final prediction results;

$w_i$ : Corresponding model weights;

$A_i$ : The classification accuracy of the results of the corresponding model running on spectral data;

5.

$$Loss = -\sum_{i=1}^n y_k \log p_k \quad (S9)$$

$y_k, y_k \in \{0,1\}$ , Represents a label of input data numbered k;

$p_k$ : The predicted outcome of the sample;

Table S1 Main modules of elastic scattering spectrum acquisition device

| Module                  | Parameter                                                          | Function                                                            | Manufacturer                                                  |
|-------------------------|--------------------------------------------------------------------|---------------------------------------------------------------------|---------------------------------------------------------------|
| Laser                   | wavelength: 633nm                                                  | Excitation light source                                             | Shenzhen Fuzhe Technology Co., Ltd, China                     |
| Motorized turntable     | resolution: 0.001°;<br>repeatability<br>accuracy: 0.01°            | Fix and rotate the tissue sections                                  | Beijing Yixuan Intelligent Control Technology Co., Ltd, China |
| Photodiode              | response range: 400-1100nm                                         | Collect elastic scattered light signals                             | Hamamatsu Photonics Co.,Ltd, Japan                            |
| IV conversion amplifier | supply voltage: $\pm 5V$ - $\pm 15V$<br>supply current: $\pm 30mA$ | Convert and amplify output current of the photodiode to the voltage | Chengdu Kangwei Electronic Co., Ltd, China                    |
| Data acquisition cards  | ADC resolution: 16 Bit;<br>maximum sample rate: 50kS/s             | Acquire the voltage signal output by the IV conversion amplifier    | National Instruments Co., Ltd, USA                            |
| Main MCU                | STM32F103                                                          | Control the movement of the motorized turntable                     | ST Microelectronics Co., Ltd                                  |
| Power supply            | output voltage: $\pm 5V$                                           | Provide the voltage required by the system                          | Chengdu Kangwei Electronic Co., Ltd, China                    |
| PC Soft                 | DAQexpress                                                         | Displays data from the data acquisition card                        | National Instruments Co., Ltd, Switzerland                    |

Table S2 Model training platform

| Experimental platform | Parameter                               |
|-----------------------|-----------------------------------------|
| operating system      | Linux                                   |
| Anaconda              | 23.7.4                                  |
| Python                | 3.9.18                                  |
| Pytorch               | 1.12.0                                  |
| CUDA                  | 12.3                                    |
| GPU                   | NVIDIA RTX 3090                         |
| CPU                   | Intel Xeon Gold 6342                    |
| 内存                    | 251G                                    |
| IDE                   | Pycharm 2023.3.5 (Professional Edition) |

Table S3 Reference for Raman peak locations and molecular vibrational modes

| Raman displacement (cm <sup>-1</sup> ) | Peak attribution                                                                                                                                                                                                                     |
|----------------------------------------|--------------------------------------------------------------------------------------------------------------------------------------------------------------------------------------------------------------------------------------|
| 721                                    | Phospholipids in nucleic acids, C-N bonds in adenine, stretching vibration modes                                                                                                                                                     |
| 758                                    | Indole ring vibration mode of tryptophan                                                                                                                                                                                             |
| 829                                    | PO <sub>2</sub> -asymmetric stretching mode in nucleic acids and tyrosine<br>C-C bond stretching vibration mode                                                                                                                      |
| 853                                    | C-C stretching vibration mode of protein (collagen) or proline, serine and tyrosine                                                                                                                                                  |
| 1004                                   | C-C telescopic vibration mode of phenylalanine                                                                                                                                                                                       |
| 1033                                   | C-H plane bending vibration mode of aromatic compounds such as phenylalanine, tryptophan, tyrosine, etc                                                                                                                              |
| 1088                                   | PO <sub>2</sub> -asymmetric stretching pattern of DNA or RNA                                                                                                                                                                         |
| 1127                                   | Protein C-N bond stretching vibration mode; C-C telescopic vibration mode of lipids                                                                                                                                                  |
| 1173                                   | C-H planar bending vibration mode of phenylalanine, tyrosine                                                                                                                                                                         |
| 1338                                   | CH <sub>2</sub> CH <sub>3</sub> telescopic vibration mode and CH <sub>2</sub> CH <sub>3</sub> bending vibration mode for proteins and nucleic acids; C-H planar bending vibration mode of unsaturated fatty acids for common olefins |
| 1516                                   | Stretching and contraction vibrations of C=C bonds of polyene chains in $\beta$ -carotene molecules                                                                                                                                  |
| 1658                                   | Amino compound I, $\alpha$ helix structure of proteins                                                                                                                                                                               |
